# Supplementary material for: Ultrasmall catechol-PEG-anchored ferrite nanoparticles for highly sensitive magnetic resonance angiography
Source: Royal Society of Chemistry journal article supplement (doi:10.1039/d3bm02074f), 2024-01-01
Supplement: d3bm02074f1.pdf [file d3bm02074f1.pdf]

## Ultrasmall catechol-PEG-anchored ferrite nanoparticles for high sensitive magnetic resonance angiography

Yanzhi Dong,<sup>a</sup> Jiaojiao Wang,<sup>b</sup> Ting Zhou,<sup>a</sup> Jinbing Pan,<sup>c</sup> Xu Wang,<sup>d</sup> Shao-Kai Sun<sup>\*a</sup>

a. School of Medical Imaging, Tianjin Medical University, Tianjin 300203, China

b. Department of Radiology, The Second Hospital of Tianjin Medical University Tianjin 300211, China

c. Department of Radiology, Tianjin Key Laboratory of Functional Imaging, Tianjin Medical University General Hospital, Tianjin 300052, China.

d. Tianjin Key Laboratory of Technologies Enabling Development on Clinical Therapeutics and Diagnostics, School of Pharmacy, Tianjin Medical University, Tianjin 300070, China

### Corresponding Author

\*E-mail: shaokaisun@tmu.edu.cn

### Experimental procedures

#### Reagents and Materials

Erucic acid, sodium hydroxide, sodium carbonate anhydrous, oleyl alcohol, N'-N-dicyclohexylcarbodiimide, N-hydroxysuccinimide, dopamine hydrochloride and methyl thiazolyl tetrazolium (MTT) were brought from Shanghai Aladdin Biochemical Technology Co., Ltd (Shanghai, China). Iron (III) chloride hexahydrate ( $\text{FeCl}_3 \cdot 6\text{H}_2\text{O}$ ), Mn (II) chloride tetrahydrate ( $\text{MnCl}_2 \cdot 4\text{H}_2\text{O}$ ), oleic acid, dibenzyl ether and bis-carboxymethyl acid polyethylene glycol ( $\text{HOOC-PEG-COOH}$ , molecular weight (MW)=600) were obtained from Sigma-Aldrich CO., Ltd (Shanghai, China). Methyl alcohol, n-hexane, cyclohexane, chloroform, N,N-dimethylformamide were provided by Concord Technology Co., Ltd (Tianjin, China). All of reagents and materials were used as received without further purification.

#### Synthesis of Iron erucic acid and Manganese-Oleate complexes

For the synthesis of iron erucic acid complex,  $\text{FeCl}_3 \cdot 6\text{H}_2\text{O}$  (2.7 g, 10 mmol) and (10.2 g, 30 mmol) of erucic acid were dissolved in 50 mL of methanol under magnetic stirring at 40 °C. Subsequently, sodium hydroxide (1.2 g, 30 mmol) dispersed in 100 mL of methanol was dropped into the above solution at a rate of 2 mL min<sup>-1</sup> and stirred another 1.5 h. After the completion of the reaction, the precipitate comprising the iron erucic acid complex was subjected to three rounds of washing using deionized water and methanol. The as-obtained iron erucic acid complex was dried under vacuum conditions for a duration of three days.

For the synthesis of manganese oleate complex,  $\text{MnCl}_2 \cdot 4\text{H}_2\text{O}$  (1.979 g, 10 mmol) and oleic acid (5.65 g, 20 mmol) were dissolved in 50 mL of methanol under magnetic stirring at 40 °C. Subsequently, sodium hydroxide (0.8 g, 20 mmol) dispersed in 100 mL of methanol was dropped into the above solution at a rate of 2 mL min<sup>-1</sup> and stirred

another 1.5 h. After the completion of the reaction, the precipitate comprising the manganese-oleate complex was subjected to three rounds of washing using deionized water and methanol. The as-obtained manganese-oleate complex was dried under vacuum conditions for a duration of three days.

## Table of Content

Supplementary Figures (Fig. S1-S7)

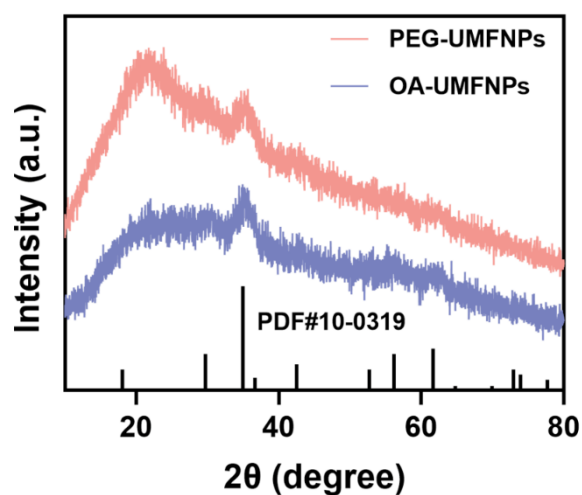

**Figure. S1** The XRD spectrum of OA-UMFNPs and PEG-UMFNPs.

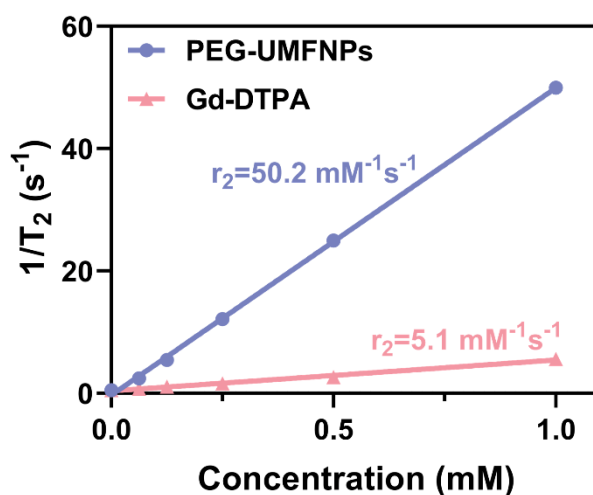

**Figure. S2** T<sub>2</sub> relaxivities of PEG-UMFNPs and Gd-DTPA.

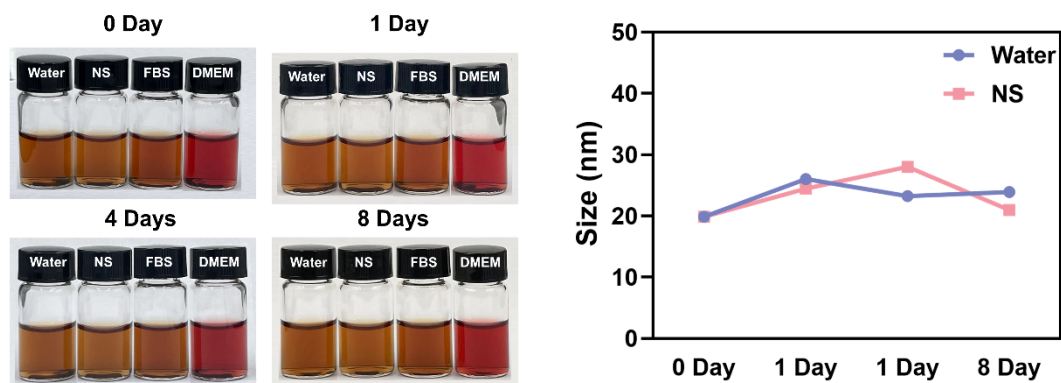

**Figure. S3** The photos of PEG-UMFNPs dissolved in various solution including water, normal saline (NS), FBS, DMEM and the hydrodynamic size of PEG-UMFNPs dissolved in water and NS at different time points.

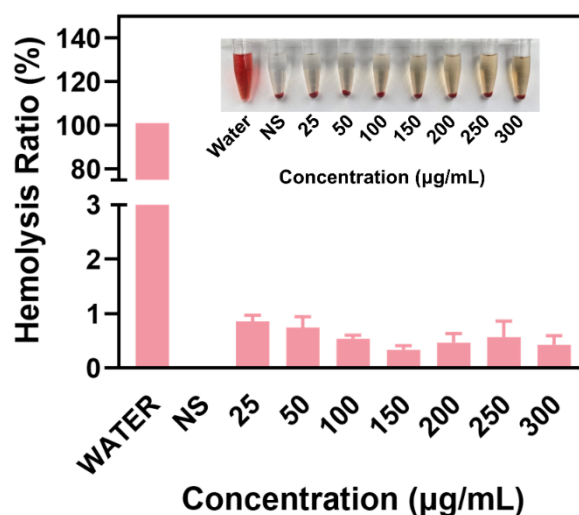

**Figure. S4** Blood compatibility evaluation of PEG-UMFNPs at various concentration ( $n = 3$ ). The data show means  $\pm$  SD.

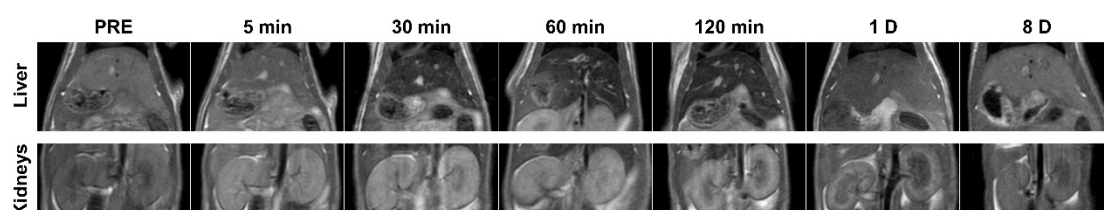

**Figure. S5** T<sub>1</sub>-weighted MR imaging of the liver and kidneys at various time points after intravenous injection of 0.1 mmol [Fe + Mn] kg<sup>-1</sup> dose of PEG-UMFNPs in normal rats.

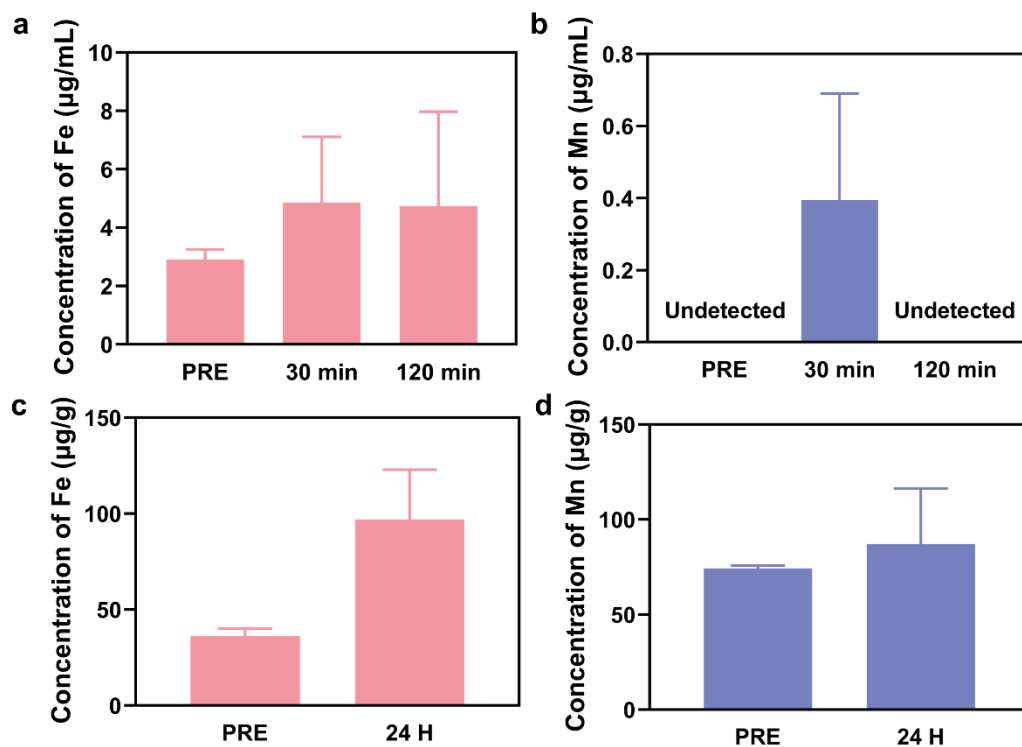

**Figure. S6** The concentrations of the Fe and Mn elements in urine (a and b) and feces (c and d) collected from normal rats administrated with 0.1 mmol [Fe + Mn] kg<sup>-1</sup> dose of PEG-UMFNPs.

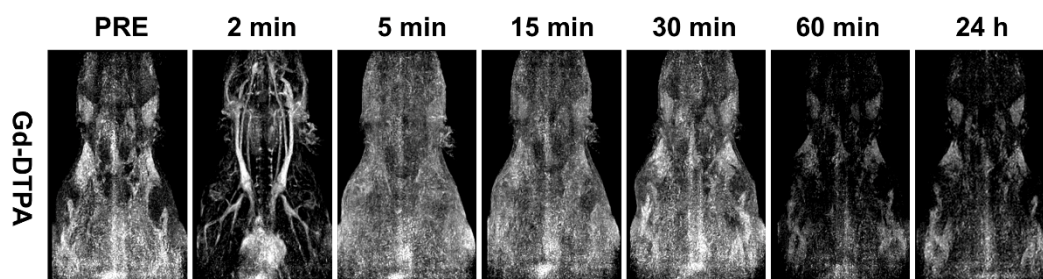

**Figure. S7** Contrast enhanced MRA (CE-MRA) images of head and neck vessels in SD rats treated with at a dosage of 0.1 mmol Gd kg<sup>-1</sup> on a clinical 3.0 T scanner.

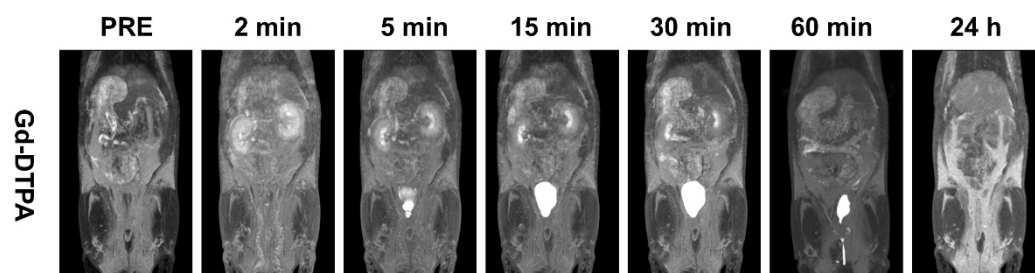

**Figure. S8** CE-MRA images of abdominal vessels in SD rats treated with at a dosage of 0.1 mmol Gd kg<sup>-1</sup> on a clinical 3.0 T scanner.

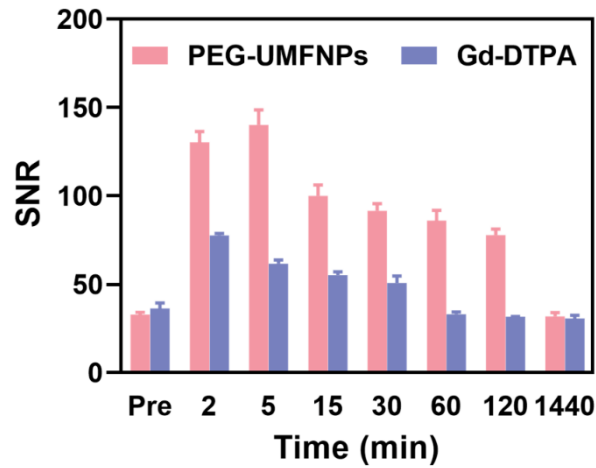

**Figure. S9** The changes of the SNR of inferior vena cava (IVC) with time. Error bars represent the standard deviation ( $n = 3$ ). The data show means  $\pm$  SD.

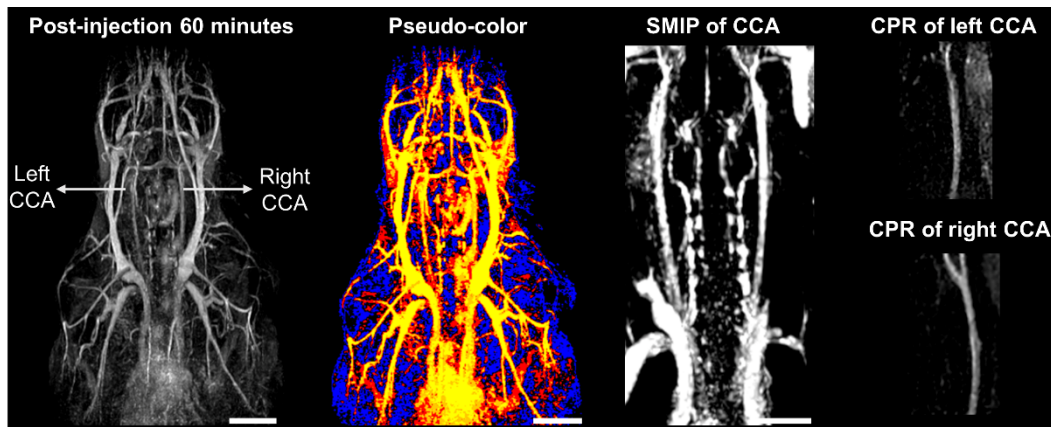

**Figure. S10** Maximum Intensity Projection (MIP) images and post-processing images of the common carotid artery (CCA) at 60 min after injection of PEG-UMFNPs. Scale bar = 10 mm.
